# Supplementary material
Source: publisher figshare collection journal article supplement (https://acs.figshare.com/ndownloader/files/14321522)
Supplement: Supplementary file 1 [file 14321522]

## ***Supporting Information***

### **Structural Identification for the Reaction of Chlorosulfonic Acid with tertiary N-donor Ligand – Ionic Liquid or Zwitterionic Compound?**

Rajkumar Kore,<sup>a,b</sup> Victor Day,<sup>c</sup> and Mark B. Shiflett<sup>a,b\*</sup>

*<sup>a</sup>Department of Chemical and Petroleum Engineering, University of Kansas, 1530 W. 15<sup>th</sup>,  
Lawrence, KS 66045, USA*

*<sup>b</sup>Center for Environmentally Beneficial Catalysis, University of Kansas, 1501 Wakarusa  
Dr, Lawrence, KS 66045, USA*

*<sup>c</sup>X-ray Crystallography Laboratory, University of Kansas, 1251 Wescoe Hall Dr, Lawrence, KS  
66045, USA*

\* Corresponding author. E-mail: [Mark.B.Shiflett@ku.edu](mailto:Mark.B.Shiflett@ku.edu).

**Pages: 5**

**Tables: 1**

## EXPERIMENTAL DETAILS

**Chemicals:** Chlorosulfonic acid ( $\text{ClSO}_3\text{H}$ ; 99% purity) was purchased from Sigma-Aldrich. Dichloromethane (DCM; 99.9% purity, extra dry) and 1-methylimidazole ( $\text{C}_1\text{im}$ , 99% purity) were purchased from ACROS Organics.

### Characterization techniques

**The NMR ( $^1\text{H}$ ,  $^{13}\text{C}$ )** spectra were obtained utilizing a Bruker AVIII 500 with cryoprobe NMR spectrometer. Each sample was dissolved in dimethyl sulfoxide- $\text{d}_6$  ( $\text{DMSO-d}_6$ ) solvent and loaded neat in a NMR tube. Elemental analyses were performed by Midwest Microlab, Inc. (Indianapolis, IN).

**Single-crystal x-ray diffraction (SCXRD):** Single crystals of  $[\text{C}_1\text{im-SO}_3]$  were subjected to low temperature X-ray structural analysis. Sets of unique diffraction data [2222  $[\text{C}_1\text{im-SO}_3]$  reflections using  $1.0^\circ$ -wide  $\omega$ - or  $\phi$ -scan frames with scan times of 4-8 seconds] were collected<sup>1</sup> for single-domain crystals of compound using monochromated  $\text{CuK}\alpha$  radiation ( $\lambda = 1.54178 \text{ \AA}$ ) on a Bruker Proteum Single Crystal Diffraction System with dual CCD detectors and associated Helios high-brilliance multilayer optics and a shared Bruker MicroSTAR microfocus Cu rotating anode x-ray source operating at 45kV and 60mA. SCXRD was collected with a Platinum 135 CCD detector at a crystal-to-detector distance of 80 mm. The integrated data<sup>2</sup> were corrected empirically for variable absorption effects using equivalent reflections. The Bruker software package SHELXTL was used to solve both structures using “direct method” techniques. All stages of weighted full-matrix least-squares refinement were conducted using  $F_o^2$  data with the SHELXTL XL v2014 software package.<sup>3</sup> Final crystallographic details are summarized in **Table S1**.

The final structural model incorporated anisotropic thermal parameters for all non-hydrogen atoms and isotropic thermal parameters for hydrogen atoms. All hydrogen atoms for both compounds were located using a difference Fourier analysis and incorporated into the structural model as independent isotropic atoms whose parameters were allowed to vary in least-squares refinement cycles.

**Powder x-ray diffraction (PXRD):** Room-temperature PXRD patterns of solid material for the compound were obtained with the Apex II detector on the Bruker Proteum Single Crystal Diffraction System. The powders were mixed with a small amount of Paratone N oil to form a paste that was placed in a small (< 0.5 mm.) nylon cryoloop and mounted on a goniometer head. The specimen was then positioned at the goniometer center-of-motion by translating it on the goniometer head. Three overlapping 1-minute  $360^\circ$   $\phi$ -scans were collected using the Bruker Apex2 v2014.11-0 software package<sup>1</sup> with the detector at  $2\theta = 30^\circ$ ,  $60^\circ$  and  $90^\circ$  using a sample-to-detector distance of 50.0 mm. These overlapping scans were merged and converted to a .RAW file using the Pilot/XRD2 evaluation option that is part of the APEX2 v2014.11-0 software package. This RAW file was then processed using the Bruker EVA powder diffraction software package.<sup>4</sup> Fractional atomic coordinates from single crystal structure determinations were used with the public-domain Mercury software package<sup>5</sup> to calculate PXRD for the [C<sub>1</sub>im-SO<sub>3</sub>] ZI salt.

**Thermogravimetric analysis-Differential scanning calorimetry (TGA-DSC):** Thermal properties for ZI were analyzed using TGA and DSC. Thermal decomposition temperature and melting point were determined using TA Instruments SDT Q600 under N<sub>2</sub> atmosphere. The analyses were conducted following a heating rate of  $5^\circ\text{Cmin}^{-1}$  up to  $600^\circ\text{C}$  under nitrogen flow.

**Table S1.** Crystal data and structure refinement for [C<sub>1</sub>im-SO<sub>3</sub>] ZI salt.

|                                                     | [C <sub>1</sub> im-SO <sub>3</sub> ]                          |
|-----------------------------------------------------|---------------------------------------------------------------|
| Empirical formula                                   | C <sub>4</sub> H <sub>6</sub> N <sub>2</sub> O <sub>3</sub> S |
| Formula weight                                      | 162.17                                                        |
| Temperature                                         | 200(2) K                                                      |
| Wavelength                                          | 1.54178 Å                                                     |
| Crystal system                                      | Monoclinic                                                    |
| Space group                                         | P2 <sub>1</sub> /n                                            |
| <i>a</i>                                            | 7.0495(2) Å                                                   |
| <i>b</i>                                            | 8.9099(3) Å                                                   |
| <i>c</i>                                            | 10.4603(3) Å                                                  |
| <i>α</i>                                            | 90°                                                           |
| <i>β</i>                                            | 91.744(2)°                                                    |
| <i>γ</i>                                            | 90°                                                           |
| Volume                                              | 656.71(3) Å <sup>3</sup>                                      |
| <i>Z</i>                                            | 4                                                             |
| Density (calculated)                                | 1.640 g/cm <sup>3</sup>                                       |
| Absorption coefficient                              | 4.015 mm <sup>-1</sup>                                        |
| F(000)                                              | 336                                                           |
| Crystal size                                        | 0.09 x 0.05 x 0.02 mm <sup>3</sup>                            |
| Theta range for data collection                     | 6.53 to 67.98°                                                |
| Index ranges                                        | -8 ≤ <i>h</i> ≤ 7, -10 ≤ <i>k</i> ≤ 10, -9 ≤ <i>l</i> ≤ 12    |
| Reflections collected                               | 3439                                                          |
| Independent reflections                             | 1154 [ <i>R</i> <sub>int</sub> = 0.030]                       |
| Completeness to <i>θ</i> =66.0°                     | 98.0 %                                                        |
| Absorption correction                               | Multi-scan                                                    |
| Max. and min. transmission                          | 1.000 and 0.840                                               |
| Refinement method                                   | Full-matrix least-squares on <i>F</i> <sup>2</sup>            |
| Data / restraints / parameters                      | 1154 / 0 / 115                                                |
| Goodness-of-fit on <i>F</i> <sup>2</sup>            | 1.044                                                         |
| Final <i>R</i> indices [ <i>I</i> > 2σ( <i>I</i> )] | <i>R</i> <sub>1</sub> = 0.033, <i>wR</i> <sub>2</sub> = 0.087 |
| <i>R</i> indices (all data)                         | <i>R</i> <sub>1</sub> = 0.037, <i>wR</i> <sub>2</sub> = 0.090 |
| Largest diff. peak and hole                         | 0.24 and -0.25 e <sup>-</sup> /Å <sup>3</sup>                 |

## REFERENCES

---

- <sup>1</sup> Data Collection: SMART Software in APEX2 v2014.11-0 Suite. Bruker-AXS, 5465 E. Cheryl Parkway, Madison, WI 53711-5373 USA.
- <sup>2</sup> Data Reduction: SAINT Software in APEX2 v2014.11-0 Suite. Bruker-AXS, 5465 E. Cheryl Parkway, Madison, WI 53711-5373 USA.
- <sup>3</sup> Refinement: SHELXTL Software in APEX2 v2014.11-0 Suite. Bruker-AXS, 5465 E. Cheryl Parkway, Madison, WI 53711-5373 USA.
- <sup>4</sup> PXRD Processing: EVA Software in Bruker DIFFRAC Suite. Bruker-AXS, 5465 E. Cheryl Parkway, Madison, WI 53711-5373 USA.
- <sup>5</sup> Macrae, C. F.; Bruno, I. J.; Chisholm, J. A.; Edgington, P. R.; McCabe, P.; Pidcock, E.; Rodriguez-Monge, L.; Taylor, R.; Van de Streek, J.; Wood, P. A. Mercury CSD 2.0 - new features for the visualization and investigation of crystal structures. *J. Appl. Cryst.* **2008**, *41*, 466-470.
